# Supplementary material for: Effects of Albumin Infusion on Serum Levels of Albumin, Proinflammatory Cytokines (TNF-α, IL-1, and IL-6), CRP, and MMP-8; Tissue Expression of EGRF, ERK1, ERK2, TGF-β, Collagen, and MMP-8; and Wound Healing in Sprague Dawley Rats
Source: Hindawi journal article supplement (doi:10.1155/2020/3254017), 2020-05-20
Supplement: f1 [file 3254017.f1.pdf]

## SUPPLEMENTARY FILES

### 1. Analysis of albumin level and body weight pre surgery

#### Descriptives

Body weight

|         | N  | Mean    | Std. Deviation | Std. Error | 95% Confidence Interval for Mean |             | Minimum | Maximum |
|---------|----|---------|----------------|------------|----------------------------------|-------------|---------|---------|
|         |    |         |                |            | Lower Bound                      | Upper Bound |         |         |
|         |    |         |                |            | Group A                          | 5           |         |         |
| Group B | 5  | 304,800 | 14,7589        | 6,6004     | 286,474                          | 323,126     | 287,5   | 324,5   |
| Group C | 5  | 342,720 | 54,3817        | 24,3202    | 275,196                          | 410,244     | 256,1   | 386,0   |
| Group D | 5  | 325,240 | 49,3403        | 22,0656    | 263,976                          | 386,504     | 267,0   | 387,5   |
| Group E | 5  | 254,040 | 9,5393         | 4,2661     | 242,195                          | 265,885     | 248,5   | 270,9   |
| Total   | 25 | 294,396 | 50,9409        | 10,1882    | 273,369                          | 315,423     | 217,0   | 387,5   |

Describe the body weight data frequencies in each group before the surgery

#### Descriptives

Albumin Level

|         | N  | Mean  | Std. Deviation | Std. Error | 95% Confidence Interval for Mean |             | Minimum | Maximum |
|---------|----|-------|----------------|------------|----------------------------------|-------------|---------|---------|
|         |    |       |                |            | Lower Bound                      | Upper Bound |         |         |
|         |    |       |                |            | Group A                          | 5           |         |         |
| Group B | 5  | 3,060 | ,4930          | ,2205      | 2,448                            | 3,672       | 2,7     | 3,9     |
| Group C | 5  | 2,580 | ,0837          | ,0374      | 2,476                            | 2,684       | 2,5     | 2,7     |
| Group D | 5  | 2,780 | ,2950          | ,1319      | 2,414                            | 3,146       | 2,4     | 3,2     |
| Group E | 5  | 3,120 | ,4868          | ,2177      | 2,516                            | 3,724       | 2,7     | 3,7     |
| Total   | 25 | 2,912 | ,3734          | ,0747      | 2,758                            | 3,066       | 2,4     | 3,9     |

Describe the Albumine level data frequencies in each group before the surgery

**ANOVA**

Body Weight

|                | Sum of Squares | df | Mean Square | F     | Sig. |
|----------------|----------------|----|-------------|-------|------|
| Between Groups | 37228,130      | 4  | 9307,032    | 7,430 | ,001 |
| Within Groups  | 25051,380      | 20 | 1252,569    |       |      |
| Total          | 62279,510      | 24 |             |       |      |

**ANOVA**

Albumin Level

|                | Sum of Squares | df | Mean Square | F     | Sig. |
|----------------|----------------|----|-------------|-------|------|
| Between Groups | 4,250          | 4  | 1,063       | 5,477 | ,004 |
| Within Groups  | 3,880          | 20 | ,194        |       |      |
| Total          | 8,130          | 24 |             |       |      |

Normality Test Of Body Weight And Albumin Level Pre-Surgery

**One-Sample Kolmogorov-Smirnov Test**

|                           | Group          | Body Weight | Albumin Level |
|---------------------------|----------------|-------------|---------------|
| N                         | 25             | 25          | 25            |
| Normal                    | Mean           | 3,00        | 294,396       |
| Parameters <sup>a,b</sup> | Std. Deviation | 1,443       | 50,9409       |
| Most Extreme              | Absolute       | ,156        | ,134          |
| Differences               | Positive       | ,156        | ,134          |
|                           | Negative       | -,156       | -,115         |
| Kolmogorov-Smirnov Z      |                | ,779        | ,670          |
| Asymp. Sig. (2-tailed)    |                | ,579        | ,761          |

a. Test distribution is Normal.

b. Calculated from data.

Describe the data distribution analysis for body weight and albumin level, both data were normally distributed

Homogeneity test for Albumin level and body weight

**Body Weight**

| Group                                 |                                 | N | Subset for alpha = 0.05 |         |
|---------------------------------------|---------------------------------|---|-------------------------|---------|
|                                       |                                 |   | 1                       | 2       |
| Student-<br>Newman-Keuls <sup>a</sup> | Control                         | 5 | 245,180                 |         |
|                                       | Hypoalbumin                     | 5 | 254,040                 |         |
|                                       | Albumin Infusion pre surgery    | 5 |                         | 304,800 |
|                                       | Albumin Infusion post surgery   | 5 |                         | 325,240 |
|                                       | Normal Protein Diet pre surgery | 5 |                         | 342,720 |
|                                       | Sig.                            |   |                         | ,696    |
| Tukey HSD <sup>a</sup>                | Control                         | 5 | 245,180                 |         |
|                                       | Hypoalbumin                     | 5 | 254,040                 |         |
|                                       | Albumin Infusion pre surgery    | 5 | 304,800                 | 304,800 |
|                                       | Albumin Infusion post surgery   | 5 |                         | 325,240 |
|                                       | Normal Protein Diet pre surgery | 5 |                         | 342,720 |
|                                       | Sig.                            |   |                         | ,096    |

Means for groups in homogeneous subsets are displayed.

a. Uses Harmonic Mean Sample Size = 5,000.

**Albumin**

| Group                                 |                                | N | Subset for alpha = 0.05 |        |
|---------------------------------------|--------------------------------|---|-------------------------|--------|
|                                       |                                |   | 1                       | 2      |
| Student-<br>Newman-Keuls <sup>a</sup> | Albumin Infusion Pre Surgery   | 5 | 1,6600                  |        |
|                                       | Albumin Infusion Post surgery  | 5 | 1,7000                  |        |
|                                       | Hypoalbumin                    | 5 | 1,8400                  |        |
|                                       | Normal Protein Diet presurgery | 5 | 1,8800                  |        |
|                                       | Control                        | 5 |                         | 2,7800 |
|                                       | Sig.                           |   |                         | ,858   |
| Tukey HSD <sup>a</sup>                | Albumin Infusion Pre Surgery   | 5 | 1,6600                  |        |
|                                       | Albumin Infusion Post surgery  | 5 | 1,7000                  |        |
|                                       | Hypoalbumin                    | 5 | 1,8400                  |        |
|                                       | Normal Protein Diet presurgery | 5 | 1,8800                  |        |
|                                       | Control                        | 5 |                         | 2,7800 |
|                                       | Sig.                           |   |                         | ,931   |

Means for groups in homogeneous subsets are displayed.

a. Uses Harmonic Mean Sample Size = 5,000.

**2. Plasma Measurement Result**

| <b>RAT'S PLASMA MEASUREMENT RESULT<br/>POST SURGERY</b> |             |       |
|---------------------------------------------------------|-------------|-------|
| <b>TNFa</b>                                             |             |       |
|                                                         | Value       | Group |
| 0,544                                                   | 1,885732525 | A1    |
| 0,753                                                   | 2,552824769 | A2    |
| 0,763                                                   | 2,584743058 | A3    |
| 0,772                                                   | 2,613469518 | A4    |
| 1,212                                                   | 4,017874242 | A5    |
| 1,388                                                   | 4,579636132 | D1    |
| 1,524                                                   | 5,013724864 | D2    |
| 1,551                                                   | 5,099904245 | C1    |
| 1,639                                                   | 5,38078519  | C2    |
| 1,694                                                   | 5,55633578  | B2-1  |
| 1,716                                                   | 5,626556017 | B2-2  |
| 1,841                                                   | 6,025534631 | D3    |
| 1,857                                                   | 6,076603894 | D4    |
| 1,866                                                   | 6,105330354 | C3    |
| 1,982                                                   | 6,475582509 | B2-3  |
| 2,141                                                   | 6,983083307 | C4    |
| 2,302                                                   | 7,496967763 | B2-4  |
| 2,31                                                    | 7,522502394 | D5    |
| 2,395                                                   | 7,793807852 | C4    |
| 2,934                                                   | 9,514203639 | B2-5  |
| 2,959                                                   | 9,593999362 | B1-1  |
| 3,215                                                   | 10,41110756 | B1-2  |
| 3,35                                                    | 10,84200447 | B1-3  |
| 3,352                                                   | 10,84838813 | B1-4  |
| 3,404                                                   | 11,01436323 | B1-5  |
| <b>IL6</b>                                              |             |       |
|                                                         | Value       | Group |
| 0,21                                                    | 5,5         | A1    |
| 0,227                                                   | 7,573170732 | A2    |
| 0,237                                                   | 8,792682927 | A3    |
| 0,241                                                   | 9,280487805 | A4    |
| 0,244                                                   | 9,646341463 | A5    |
| 0,248                                                   | 10,13414634 | D1    |
| 0,25                                                    | 10,37804878 | D2    |
| 0,26                                                    | 11,59756098 | C1    |
| 0,262                                                   | 11,84146341 | C2    |
| 0,262                                                   | 11,84146341 | B2-1  |
| 0,279                                                   | 13,91463415 | B2-2  |
| 0,284                                                   | 14,52439024 | D3    |

|             |             |       |
|-------------|-------------|-------|
| 0,293       | 15,62195122 | D4    |
| 0,301       | 16,59756098 | C3    |
| 0,309       | 17,57317073 | B2-3  |
| 0,316       | 18,42682927 | C4    |
| 0,328       | 19,8902439  | B2-4  |
| 0,336       | 20,86585366 | D5    |
| 0,337       | 20,98780488 | C4    |
| 0,349       | 22,45121951 | B2-5  |
| 0,386       | 26,96341463 | B1-1  |
| 0,389       | 27,32926829 | B1-2  |
| 0,406       | 29,40243902 | B1-3  |
| 0,431       | 32,45121951 | B1-4  |
| 0,9         | 89,64634146 | B1-5  |
| <b>IL1</b>  |             |       |
|             | Value       | Group |
| 0,541       | 9,902555911 | A1    |
| 0,728       | 12,88977636 | A2    |
| 0,742       | 13,11341853 | A3    |
| 0,752       | 13,27316294 | A4    |
| 1,187       | 20,22204473 | A5    |
| 1,372       | 23,17731629 | D1    |
| 1,503       | 25,26996805 | D2    |
| 1,53        | 25,70127796 | C1    |
| 1,657       | 27,73003195 | C2    |
| 1,677       | 28,04952077 | B2-1  |
| 1,679       | 28,08146965 | B2-2  |
| 1,804       | 30,07827476 | D3    |
| 1,828       | 30,46166134 | D4    |
| 1,83        | 30,49361022 | C3    |
| 1,941       | 32,26677316 | B2-3  |
| 2,119       | 35,11022364 | C4    |
| 2,257       | 37,31469649 | B2-4  |
| 2,258       | 37,33067093 | D5    |
| 2,36        | 38,9600639  | C4    |
| 2,876       | 47,2028754  | B2-5  |
| 2,922       | 47,93769968 | B1-1  |
| 3,198       | 52,34664537 | B1-2  |
| 3,252       | 53,20926518 | B1-3  |
| 3,302       | 54,00798722 | B1-4  |
| 3,334       | 54,51916933 | B1-5  |
| <b>MMP8</b> |             |       |
|             | Value       | Group |
| 0,212       | 18,85714286 | A1    |

|            |             |       |
|------------|-------------|-------|
| 0,23       | 27,42857143 | A2    |
| 0,239      | 31,71428571 | A3    |
| 0,242      | 33,14285714 | A4    |
| 0,246      | 35,04761905 | A5    |
| 0,251      | 37,42857143 | D1    |
| 0,252      | 37,9047619  | D2    |
| 0,262      | 42,66666667 | C1    |
| 0,263      | 43,14285714 | C2    |
| 0,28       | 51,23809524 | B2-1  |
| 0,286      | 54,0952381  | B2-2  |
| 0,291      | 56,47619048 | D3    |
| 0,292      | 56,95238095 | D4    |
| 0,302      | 61,71428571 | C3    |
| 0,31       | 65,52380952 | B2-3  |
| 0,32       | 70,28571429 | C4    |
| 0,327      | 73,61904762 | B2-4  |
| 0,335      | 77,42857143 | D5    |
| 0,338      | 78,85714286 | C4    |
| 0,352      | 85,52380952 | B2-5  |
| 0,364      | 91,23809524 | B1-1  |
| 0,388      | 102,6666667 | B1-2  |
| 0,391      | 104,0952381 | B1-3  |
| 0,409      | 112,6666667 | B1-4  |
| 0,431      | 123,1428571 | B1-5  |
| <b>CRP</b> |             |       |
|            | Value       | Group |
| 0,544      | 9,410914928 | A1    |
| 0,747      | 12,66934189 | A2    |
| 0,759      | 12,86195827 | A3    |
| 0,769      | 13,02247191 | A4    |
| 1,214      | 20,16532905 | A5    |
| 1,39       | 22,99036918 | D1    |
| 1,556      | 25,65489567 | D2    |
| 1,572      | 25,9117175  | C1    |
| 1,644      | 27,06741573 | C2    |
| 1,69       | 27,80577849 | B2-1  |
| 1,715      | 28,2070626  | B2-2  |
| 1,837      | 30,16532905 | D3    |
| 1,86       | 30,53451043 | D4    |
| 1,865      | 30,61476726 | C3    |
| 1,981      | 32,47672552 | B2-3  |
| 2,143      | 35,07704655 | C4    |
| 2,302      | 37,62921348 | B2-4  |



|       |             |      |
|-------|-------------|------|
| 2,304 | 37,66131621 | D5   |
| 2,402 | 39,23434992 | C4   |
| 2,913 | 47,43659711 | B2-5 |
| 2,936 | 47,80577849 | B1-1 |
| 3,151 | 51,25682183 | B1-2 |
| 3,318 | 53,93739968 | B1-3 |
| 3,334 | 54,19422151 | B1-4 |
| 3,336 | 54,22632424 | B1-5 |

**ELISA results of the pro-inflammatory cytokine level in blood plasma**

**3. Immunohistochemistry Measurement Result**

| <b>Group</b> |          | <b>IMMUNOHISTOCHEMISTRY MEASUREMENT RESULT</b> |                     |              |                     |              |              |
|--------------|----------|------------------------------------------------|---------------------|--------------|---------------------|--------------|--------------|
|              |          | <b>COLAGEN-1</b>                               | <b>MMP-8 active</b> | <b>tgfb1</b> | <b>egfr-phospho</b> | <b>erk 1</b> | <b>erk 2</b> |
| <b>A</b>     | <b>1</b> | 26                                             | 9                   | 19           | 8                   | 7            | 11           |
|              | <b>2</b> | 20                                             | 8                   | 21           | 7                   | 11           | 14           |
|              | <b>3</b> | 21                                             | 11                  | 21           | 7                   | 12           | 15           |
|              | <b>4</b> | 17                                             | 2                   | 23           | 8                   | 10           | 10           |
|              | <b>5</b> | 11                                             | 6                   | 18           | 6                   | 9            | 17           |
|              | <b>6</b> | 16                                             | 9                   | 20           | 11                  | 11           | 21           |
| <b>B</b>     | <b>1</b> | 6                                              | 21                  | 9            | 3                   | 5            | 6            |
|              | <b>2</b> | 5                                              | 25                  | 8            | 6                   | 2            | 8            |
|              | <b>3</b> | 9                                              | 20                  | 3            | 3                   | 9            | 9            |
|              | <b>4</b> | 11                                             | 21                  | 6            | 2                   | 5            | 4            |
|              | <b>5</b> | 9                                              | 20                  | 9            | 6                   | 5            | 8            |
|              | <b>6</b> | 5                                              | 21                  | 6            | 6                   | 4            | 9            |
| <b>C</b>     | <b>1</b> | 18                                             | 11                  | 11           | 21                  | 19           | 20           |
|              | <b>2</b> | 19                                             | 10                  | 13           | 17                  | 14           | 15           |

|          |          |    |    |    |    |    |    |
|----------|----------|----|----|----|----|----|----|
|          | <b>3</b> | 21 | 15 | 15 | 15 | 15 | 14 |
|          | <b>4</b> | 20 | 10 | 19 | 17 | 10 | 10 |
|          | <b>5</b> | 15 | 13 | 11 | 21 | 11 | 12 |
|          | <b>6</b> | 22 | 10 | 11 | 23 | 19 | 14 |
| <b>D</b> | <b>1</b> | 21 | 6  | 20 | 20 | 16 | 21 |
|          | <b>2</b> | 20 | 8  | 19 | 24 | 18 | 29 |
|          | <b>3</b> | 25 | 4  | 22 | 21 | 20 | 20 |
|          | <b>4</b> | 26 | 9  | 23 | 17 | 22 | 24 |
|          | <b>5</b> | 20 | 8  | 18 | 19 | 20 | 23 |
|          | <b>6</b> | 21 | 11 | 17 | 22 | 14 | 21 |

| <b>MEAN OF IMMUNOHISTOCHEMISTRY MEASUREMENT RESULT</b> |                     |              |                     |             |             | <b>Group</b> |
|--------------------------------------------------------|---------------------|--------------|---------------------|-------------|-------------|--------------|
| <b>COLAGEN-1</b>                                       | <b>MMP-8 active</b> | <b>tgfb1</b> | <b>egfr-phospho</b> | <b>erk1</b> | <b>erk2</b> |              |
| <b>14</b>                                              | <b>5</b>            | <b>20</b>    | <b>8</b>            | <b>10</b>   | <b>15</b>   | <b>A</b>     |
| <b>8</b>                                               | <b>21</b>           | <b>7</b>     | <b>4</b>            | <b>5</b>    | <b>7</b>    | <b>B</b>     |
| <b>19</b>                                              | <b>12</b>           | <b>13</b>    | <b>19</b>           | <b>15</b>   | <b>14</b>   | <b>C</b>     |
| <b>22</b>                                              | <b>8</b>            | <b>20</b>    | <b>21</b>           | <b>18</b>   | <b>23</b>   | <b>D</b>     |

#### **IMMUNOHISTOCHEMISTRY ANALYSIS**

| <b>Group</b>   | <b>Day</b> | <b>colagen</b> | <b>MMP8</b> | <b>TGFb1</b> | <b>EGFRp</b> | <b>ERK1</b> | <b>ERK2</b> |
|----------------|------------|----------------|-------------|--------------|--------------|-------------|-------------|
| <b>Group A</b> | <b>1</b>   | 12             | 12          | 11           | 10           | 12          | 10          |
|                |            | 15             | 10          | 12           | 9            | 14          | 9           |
|                |            | 10             | 9           | 20           | 18           | 10          | 14          |

|                |    |    |    |    |    |    |    |
|----------------|----|----|----|----|----|----|----|
|                |    | 18 | 18 | 26 | 10 | 17 | 12 |
|                |    | 11 | 11 | 21 | 12 | 19 | 9  |
|                |    | 12 | 8  | 20 | 11 | 21 | 11 |
|                |    | 10 | 11 | 23 | 9  | 11 | 12 |
|                |    | 15 | 10 | 24 | 7  | 10 | 10 |
|                |    | 18 | 9  | 20 | 9  | 9  | 9  |
| <b>Group E</b> |    | 10 | 8  | 19 | 11 | 8  | 8  |
|                |    | 11 | 11 | 20 | 10 | 14 | 12 |
|                |    | 14 | 12 | 26 | 10 | 10 | 9  |
|                |    | 10 | 11 | 11 | 9  | 12 | 9  |
|                |    | 12 | 10 | 12 | 10 | 10 | 8  |
| <b>Group D</b> |    | 10 | 12 | 10 | 12 | 15 | 11 |
|                |    | 15 | 14 | 15 | 15 | 12 | 12 |
|                |    | 10 | 12 | 12 | 14 | 10 | 9  |
|                |    | 16 | 10 | 11 | 11 | 9  | 8  |
|                |    | 10 | 12 | 20 | 15 | 10 | 11 |
| <b>Group B</b> |    | 12 | 15 | 26 | 12 | 13 | 8  |
|                |    | 15 | 10 | 24 | 14 | 14 | 10 |
|                |    | 16 | 10 | 23 | 13 | 16 | 11 |
|                |    | 14 | 9  | 19 | 14 | 17 | 10 |
|                |    | 11 | 15 | 20 | 11 | 10 | 7  |
|                |    | 15 | 12 | 18 | 10 | 15 | 10 |
|                |    | 12 | 14 | 15 | 15 | 9  | 6  |
|                |    | 10 | 10 | 22 | 12 | 14 | 12 |
|                |    | 17 | 6  | 16 | 10 | 12 | 10 |
|                |    | 20 | 9  | 18 | 9  | 10 | 10 |
| <b>Group C</b> | 3  | 15 | 14 | 29 | 10 | 12 | 12 |
| <b>Group A</b> |    | 10 | 9  | 20 | 19 | 9  | 14 |
|                |    | 12 | 10 | 15 | 14 | 14 | 15 |
|                |    | 15 | 12 | 14 | 10 | 8  | 16 |
|                |    | 9  | 15 | 13 | 22 | 10 | 12 |
|                |    | 12 | 11 | 17 | 15 | 9  | 10 |
|                |    | 11 | 13 | 13 | 11 | 11 | 11 |
| <b>Group E</b> |    | 9  | 12 | 10 | 9  | 3  | 6  |
|                |    | 8  | 18 | 10 | 2  | 5  | 9  |
|                |    | 11 | 14 | 15 | 5  | 9  | 11 |
|                | 10 | 12 | 9  | 8  | 7  | 10 |    |
|                | 7  | 15 | 10 | 4  | 5  | 16 |    |
| <b>Group D</b> | 8  | 17 | 12 | 2  | 4  | 9  |    |
|                | 11 | 11 | 12 | 12 | 9  | 9  |    |
|                | 10 | 9  | 10 | 10 | 11 | 8  |    |
|                | 12 | 12 | 13 | 15 | 12 | 11 |    |

|                                  |   |    |    |    |    |    |    |
|----------------------------------|---|----|----|----|----|----|----|
|                                  |   | 9  | 10 | 15 | 18 | 15 | 10 |
|                                  |   | 8  | 9  | 11 | 11 | 10 | 15 |
|                                  |   | 11 | 9  | 18 | 19 | 9  | 10 |
|                                  |   | 10 | 11 | 19 | 15 | 10 | 18 |
|                                  |   | 18 | 14 | 15 | 17 | 10 | 16 |
|                                  |   | 12 | 12 | 17 | 12 | 9  | 15 |
| <b>Group B</b>                   | 5 | 10 | 10 | 10 | 16 | 15 | 15 |
|                                  |   | 9  | 11 | 16 | 13 | 12 | 17 |
|                                  |   | 12 | 15 | 18 | 14 | 10 | 17 |
|                                  |   | 19 | 9  | 20 | 18 | 9  | 18 |
|                                  |   | 10 | 15 | 19 | 15 | 5  | 16 |
|                                  |   | 15 | 10 | 15 | 10 | 10 | 20 |
|                                  |   | 17 | 9  | 18 | 19 | 6  | 15 |
|                                  |   | 12 | 10 | 16 | 14 | 11 | 19 |
|                                  |   | 16 | 10 | 11 | 22 | 14 | 17 |
|                                  |   | 12 | 5  | 19 | 8  | 7  | 11 |
| <b>Group C</b><br><b>Group A</b> |   | 10 | 5  | 21 | 7  | 11 | 14 |
|                                  |   | 15 | 4  | 21 | 7  | 12 | 15 |
|                                  |   | 17 | 2  | 23 | 8  | 10 | 10 |
|                                  |   | 11 | 6  | 18 | 6  | 9  | 17 |
|                                  |   | 16 | 9  | 20 | 11 | 11 | 21 |
|                                  |   | 6  | 21 | 9  | 3  | 5  | 6  |
|                                  |   | 5  | 25 | 8  | 6  | 2  | 8  |
|                                  |   | 9  | 20 | 3  | 3  | 9  | 9  |
| <b>Group E</b>                   |   | 11 | 21 | 6  | 2  | 5  | 4  |
|                                  |   | 9  | 20 | 9  | 6  | 5  | 8  |
|                                  |   | 5  | 21 | 6  | 6  | 4  | 9  |
|                                  |   | 15 | 9  | 21 | 19 | 12 | 20 |
|                                  |   | 10 | 8  | 20 | 10 | 10 | 15 |
| <b>Group D</b>                   |   | 19 | 13 | 23 | 16 | 16 | 24 |
|                                  |   | 20 | 8  | 22 | 12 | 14 | 13 |
|                                  |   | 12 | 9  | 19 | 17 | 11 | 25 |
|                                  |   | 25 | 11 | 20 | 20 | 19 | 22 |
| <b>Group B</b><br><b>Group C</b> |   | 18 | 11 | 11 | 21 | 19 | 20 |
|                                  |   | 19 | 10 | 13 | 17 | 14 | 15 |
|                                  |   | 21 | 15 | 15 | 15 | 15 | 14 |
|                                  |   | 20 | 10 | 19 | 17 | 10 | 10 |
|                                  |   | 15 | 13 | 11 | 21 | 11 | 12 |
|                                  |   | 22 | 10 | 11 | 23 | 19 | 14 |
|                                  |   | 21 | 6  | 20 | 20 | 16 | 21 |
|                                  |   | 20 | 8  | 19 | 24 | 18 | 29 |
|                                  |   | 25 | 4  | 22 | 21 | 20 | 20 |

|                |    |    |    |    |    |    |    |
|----------------|----|----|----|----|----|----|----|
| <b>Group A</b> | 7  | 26 | 9  | 23 | 17 | 22 | 24 |
|                |    | 20 | 8  | 18 | 19 | 20 | 23 |
|                |    | 21 | 11 | 17 | 22 | 14 | 21 |
|                |    | 22 | 11 | 18 | 25 | 20 | 20 |
|                |    | 25 | 9  | 15 | 29 | 29 | 12 |
|                |    | 20 | 15 | 17 | 24 | 21 | 15 |
| <b>Group E</b> |    | 29 | 10 | 13 | 26 | 23 | 10 |
|                |    | 23 | 9  | 20 | 26 | 25 | 23 |
|                | 21 | 10 | 15 | 20 | 22 | 21 |    |
|                | 3  | 25 | 9  | 6  | 3  | 3  |    |
|                | 5  | 26 | 7  | 3  | 5  | 5  |    |
|                | 2  | 28 | 5  | 2  | 2  | 4  |    |
|                | 6  | 32 | 4  | 6  | 5  | 2  |    |
|                | 5  | 20 | 9  | 8  | 6  | 9  |    |
| <b>Group D</b> | 7  | 29 | 8  | 4  | 2  | 2  |    |
|                | 20 | 9  | 19 | 16 | 16 | 18 |    |
|                | 21 | 8  | 23 | 18 | 18 | 10 |    |
|                | 20 | 7  | 28 | 20 | 20 | 25 |    |
|                | 19 | 5  | 24 | 23 | 21 | 20 |    |
|                | 23 | 9  | 26 | 24 | 16 | 23 |    |
| <b>Group B</b> | 18 | 5  | 20 | 22 | 18 | 22 |    |
|                | 25 | 6  | 25 | 26 | 26 | 25 |    |
|                | 24 | 9  | 26 | 28 | 28 | 20 |    |
|                | 26 | 7  | 22 | 21 | 24 | 26 |    |
|                | 28 | 8  | 31 | 26 | 23 | 24 |    |
|                | 30 | 5  | 20 | 25 | 26 | 19 |    |
|                | 24 | 9  | 28 | 24 | 21 | 25 |    |
|                | 22 | 11 | 19 | 20 | 20 | 23 |    |
|                | 26 | 5  | 25 | 32 | 23 | 20 |    |
|                | 26 | 9  | 26 | 24 | 26 | 29 |    |
| <b>Group C</b> | 25 | 8  | 24 | 25 | 26 | 21 |    |
|                | 25 | 6  | 20 | 20 | 29 | 20 |    |
|                | 29 | 7  | 29 | 26 | 20 | 26 |    |

**Descriptives**

TNF $\alpha$  (ng/mL)

|       | N  | Mean     | Std. Deviation | Std. Error | 95% Confidence Interval for Mean |             | Minimum | Maximum |
|-------|----|----------|----------------|------------|----------------------------------|-------------|---------|---------|
|       |    |          |                |            | Lower Bound                      | Upper Bound |         |         |
|       |    |          |                |            | A                                | 5           |         |         |
| B     | 5  | 6,27258  | 1,119976       | ,500869    | 4,88195                          | 7,66322     | 5,100   | 7,794   |
| C     | 5  | 5,84360  | 1,139342       | ,509529    | 4,42892                          | 7,25828     | 4,580   | 7,523   |
| D     | 5  | 6,93393  | 1,642551       | ,734571    | 4,89443                          | 8,97343     | 5,556   | 9,514   |
| E     | 5  | 10,54197 | ,575074        | ,257181    | 9,82792                          | 11,25602    | 9,594   | 11,014  |
| Total | 25 | 6,46460  | 2,744709       | ,548942    | 5,33164                          | 7,59756     | 1,886   | 11,014  |

Describe TNF $\alpha$  Plasma level data frequencies in each group

**Descriptives**

IL1 (ng/mL)

|       | N  | Mean     | Std. Deviation | Std. Error | 95% Confidence Interval for Mean |             | Minimum | Maximum |
|-------|----|----------|----------------|------------|----------------------------------|-------------|---------|---------|
|       |    |          |                |            | Lower Bound                      | Upper Bound |         |         |
|       |    |          |                |            | A                                | 5           |         |         |
| B     | 5  | 31,59904 | 5,419591       | 2,423715   | 24,86973                         | 38,32835    | 25,701  | 38,960  |
| C     | 5  | 29,26358 | 5,481073       | 2,451210   | 22,45793                         | 36,06923    | 23,177  | 37,331  |
| D     | 5  | 34,58307 | 8,016305       | 3,585001   | 24,62951                         | 44,53662    | 28,050  | 47,203  |
| E     | 5  | 52,40415 | 2,628987       | 1,175719   | 49,13983                         | 55,66847    | 47,938  | 54,519  |
| Total | 25 | 32,34601 | 13,497256      | 2,699451   | 26,77461                         | 37,91740    | 9,903   | 54,519  |

Describe IL1 Plasma level data frequencies in each group

**Descriptives**

IL6 (ng/mL)

|       | N  | Mean     | Std. Deviation | Std. Error | 95% Confidence Interval for Mean |             | Minimum | Maximum |
|-------|----|----------|----------------|------------|----------------------------------|-------------|---------|---------|
|       |    |          |                |            | Lower Bound                      | Upper Bound |         |         |
|       |    |          |                |            | A                                | 5           |         |         |
| B     | 5  | 15,89024 | 4,115199       | 1,840373   | 10,78055                         | 20,99994    | 11,598  | 20,988  |
| C     | 5  | 14,30488 | 4,405799       | 1,970333   | 8,83436                          | 19,77540    | 10,134  | 20,866  |
| D     | 5  | 17,13415 | 4,313868       | 1,929220   | 11,77777                         | 22,49052    | 11,841  | 22,451  |
| E     | 5  | 29,03659 | 2,179825       | ,974847    | 26,32998                         | 31,74320    | 26,963  | 32,451  |
| Total | 25 | 16,90488 | 7,658621       | 1,531724   | 13,74355                         | 20,06620    | 5,500   | 32,451  |

Describe IL6 Plasma level data frequencies in each group

**Descriptives**

CRP (ng/mL)

|       | N  | Mean     | Std. Deviation | Std. Error | 95% Confidence Interval for Mean |             | Minimum | Maximum |
|-------|----|----------|----------------|------------|----------------------------------|-------------|---------|---------|
|       |    |          |                |            | Lower Bound                      | Upper Bound |         |         |
|       |    |          |                |            | A                                | 5           |         |         |
| B     | 5  | 31,58106 | 5,573215       | 2,492418   | 24,66100                         | 38,50112    | 25,912  | 39,234  |
| C     | 5  | 29,40128 | 5,595341       | 2,502312   | 22,45375                         | 36,34882    | 22,990  | 37,661  |
| D     | 5  | 34,71108 | 8,146043       | 3,643021   | 24,59643                         | 44,82572    | 27,806  | 47,437  |
| E     | 5  | 52,28411 | 2,795750       | 1,250297   | 48,81273                         | 55,75549    | 47,806  | 54,226  |
| Total | 25 | 32,32071 | 13,574840      | 2,714968   | 26,71729                         | 37,92412    | 9,411   | 54,226  |

Describe CRP Plasma level data frequencies in each group

**Descriptives**

MMP8 (ng/mL)

|       | N  | Mean      | Std. Deviation | Std. Error | 95% Confidence Interval for Mean |             | Minimum | Maximum |
|-------|----|-----------|----------------|------------|----------------------------------|-------------|---------|---------|
|       |    |           |                |            | Lower Bound                      | Upper Bound |         |         |
|       |    |           |                |            | A                                | 5           |         |         |
| B     | 5  | 59,33333  | 16,176465      | 7,234335   | 39,24760                         | 79,41907    | 42,667  | 78,857  |
| C     | 5  | 53,23810  | 16,541708      | 7,397677   | 32,69885                         | 73,77734    | 37,429  | 77,429  |
| D     | 5  | 66,00000  | 14,134116      | 6,320969   | 48,45018                         | 83,54982    | 51,238  | 85,524  |
| E     | 5  | 106,76190 | 11,917136      | 5,329505   | 91,96483                         | 121,55898   | 91,238  | 123,143 |
| Total | 25 | 62,91429  | 28,532089      | 5,706418   | 51,13682                         | 74,69175    | 18,857  | 123,143 |

Describe MMP-8 Plasma level data frequencies in each group

**ANOVA**

TNFa (ng/mL)

|                | Sum of Squares | df | Mean Square | F      | Sig. |
|----------------|----------------|----|-------------|--------|------|
| Between Groups | 156,040        | 4  | 39,010      | 31,508 | ,000 |
| Within Groups  | 24,762         | 20 | 1,238       |        |      |
| Total          | 180,802        | 24 |             |        |      |

**ANOVA**

IL1 (ng/mL)

|                | Sum of Squares | df | Mean Square | F      | Sig. |
|----------------|----------------|----|-------------|--------|------|
| Between Groups | 3791,897       | 4  | 947,974     | 32,670 | ,000 |
| Within Groups  | 580,325        | 20 | 29,016      |        |      |
| Total          | 4372,222       | 24 |             |        |      |

**ANOVA**

IL6 (ng/mL)

|                | Sum of Squares | df | Mean Square | F      | Sig. |
|----------------|----------------|----|-------------|--------|------|
| Between Groups | 1157,594       | 4  | 289,399     | 23,141 | ,000 |
| Within Groups  | 250,113        | 20 | 12,506      |        |      |
| Total          | 1407,707       | 24 |             |        |      |



**ANOVA**

CRP (ng/mL)

|                | Sum of Squares | df | Mean Square | F      | Sig. |
|----------------|----------------|----|-------------|--------|------|
| Between Groups | 3814,067       | 4  | 953,517     | 31,337 | ,000 |
| Within Groups  | 608,564        | 20 | 30,428      |        |      |
| Total          | 4422,631       | 24 |             |        |      |

**ANOVA**

MMP8 (ng/mL)

|                | Sum of Squares | df | Mean Square | F      | Sig. |
|----------------|----------------|----|-------------|--------|------|
| Between Groups | 15863,365      | 4  | 3965,841    | 21,585 | ,000 |
| Within Groups  | 3674,558       | 20 | 183,728     |        |      |
| Total          | 19537,923      | 24 |             |        |      |

**Multiple Comparisons**

TNFa (ng/mL)  
Tukey HSD

| (I) GROUP | (J) GROUP | Mean Difference (I-J) | Std. Error | Sig. | 95% Confidence Interval |             |
|-----------|-----------|-----------------------|------------|------|-------------------------|-------------|
|           |           |                       |            |      | Lower Bound             | Upper Bound |
| A         | B         | -3,541653*            | ,703733    | ,001 | -5,64749                | -1,43582    |
|           | C         | -3,112672*            | ,703733    | ,002 | -5,21850                | -1,00684    |
|           | D         | -4,203000*            | ,703733    | ,000 | -6,30883                | -2,09717    |
|           | E         | -7,811044*            | ,703733    | ,000 | -9,91688                | -5,70521    |
| B         | A         | 3,541653*             | ,703733    | ,001 | 1,43582                 | 5,64749     |
|           | C         | ,428982               | ,703733    | ,972 | -1,67685                | 2,53481     |
|           | D         | -,661347              | ,703733    | ,878 | -2,76718                | 1,44449     |
|           | E         | -4,269390*            | ,703733    | ,000 | -6,37522                | -2,16356    |
| C         | A         | 3,112672*             | ,703733    | ,002 | 1,00684                 | 5,21850     |
|           | B         | -,428982              | ,703733    | ,972 | -2,53481                | 1,67685     |
|           | D         | -1,090329             | ,703733    | ,544 | -3,19616                | 1,01550     |
|           | E         | -4,698372*            | ,703733    | ,000 | -6,80420                | -2,59254    |
| D         | A         | 4,203000*             | ,703733    | ,000 | 2,09717                 | 6,30883     |
|           | B         | ,661347               | ,703733    | ,878 | -1,44449                | 2,76718     |
|           | C         | 1,090329              | ,703733    | ,544 | -1,01550                | 3,19616     |
|           | E         | -3,608043*            | ,703733    | ,000 | -5,71388                | -1,50221    |
| E         | A         | 7,811044*             | ,703733    | ,000 | 5,70521                 | 9,91688     |
|           | B         | 4,269390*             | ,703733    | ,000 | 2,16356                 | 6,37522     |
|           | C         | 4,698372*             | ,703733    | ,000 | 2,59254                 | 6,80420     |
|           | D         | 3,608043*             | ,703733    | ,000 | 1,50221                 | 5,71388     |

\*. The mean difference is significant at the 0.05 level.

**Multiple Comparisons**

IL1 (ng/mL)  
Tukey HSD

| (I) GROUP | (J) GROUP | Mean Difference (I-J) | Std. Error | Sig. | 95% Confidence Interval |             |
|-----------|-----------|-----------------------|------------|------|-------------------------|-------------|
|           |           |                       |            |      | Lower Bound             | Upper Bound |
| A         | B         | -17,718850*           | 3,406833   | ,000 | -27,91337               | -7,52433    |
|           | C         | -15,383387*           | 3,406833   | ,002 | -25,57791               | -5,18887    |
|           | D         | -20,702875*           | 3,406833   | ,000 | -30,89739               | -10,50836   |
|           | E         | -38,523962*           | 3,406833   | ,000 | -48,71848               | -28,32944   |
| B         | A         | 17,718850*            | 3,406833   | ,000 | 7,52433                 | 27,91337    |
|           | C         | 2,335463              | 3,406833   | ,957 | -7,85906                | 12,52998    |
|           | D         | -2,984026             | 3,406833   | ,902 | -13,17854               | 7,21049     |
|           | E         | -20,805112*           | 3,406833   | ,000 | -30,99963               | -10,61059   |
| C         | A         | 15,383387*            | 3,406833   | ,002 | 5,18887                 | 25,57791    |
|           | B         | -2,335463             | 3,406833   | ,957 | -12,52998               | 7,85906     |
|           | D         | -5,319489             | 3,406833   | ,537 | -15,51401               | 4,87503     |
|           | E         | -23,140575*           | 3,406833   | ,000 | -33,33509               | -12,94606   |
| D         | A         | 20,702875*            | 3,406833   | ,000 | 10,50836                | 30,89739    |
|           | B         | 2,984026              | 3,406833   | ,902 | -7,21049                | 13,17854    |
|           | C         | 5,319489              | 3,406833   | ,537 | -4,87503                | 15,51401    |
|           | E         | -17,821086*           | 3,406833   | ,000 | -28,01561               | -7,62657    |
| E         | A         | 38,523962*            | 3,406833   | ,000 | 28,32944                | 48,71848    |
|           | B         | 20,805112*            | 3,406833   | ,000 | 10,61059                | 30,99963    |
|           | C         | 23,140575*            | 3,406833   | ,000 | 12,94606                | 33,33509    |
|           | D         | 17,821086*            | 3,406833   | ,000 | 7,62657                 | 28,01561    |

\*. The mean difference is significant at the 0.05 level.

**Multiple Comparisons**

IL6 (ng/mL)  
Tukey HSD

| (I) GROUP | (J) GROUP | Mean Difference (I-J) | Std. Error | Sig. | 95% Confidence Interval |             |
|-----------|-----------|-----------------------|------------|------|-------------------------|-------------|
|           |           |                       |            |      | Lower Bound             | Upper Bound |
| A         | B         | -7,731707*            | 2,236573   | ,019 | -14,42437               | -1,03904    |
|           | C         | -6,146341             | 2,236573   | ,082 | -12,83901               | ,54632      |
|           | D         | -8,975610*            | 2,236573   | ,005 | -15,66828               | -2,28294    |
|           | E         | -20,878049*           | 2,236573   | ,000 | -27,57071               | -14,18538   |
| B         | A         | 7,731707*             | 2,236573   | ,019 | 1,03904                 | 14,42437    |
|           | C         | 1,585366              | 2,236573   | ,952 | -5,10730                | 8,27803     |
|           | D         | -1,243902             | 2,236573   | ,980 | -7,93657                | 5,44876     |
|           | E         | -13,146341*           | 2,236573   | ,000 | -19,83901               | -6,45368    |
| C         | A         | 6,146341              | 2,236573   | ,082 | -,54632                 | 12,83901    |
|           | B         | -1,585366             | 2,236573   | ,952 | -8,27803                | 5,10730     |
|           | D         | -2,829268             | 2,236573   | ,715 | -9,52193                | 3,86340     |
|           | E         | -14,731707*           | 2,236573   | ,000 | -21,42437               | -8,03904    |
| D         | A         | 8,975610*             | 2,236573   | ,005 | 2,28294                 | 15,66828    |
|           | B         | 1,243902              | 2,236573   | ,980 | -5,44876                | 7,93657     |
|           | C         | 2,829268              | 2,236573   | ,715 | -3,86340                | 9,52193     |
|           | E         | -11,902439*           | 2,236573   | ,000 | -18,59510               | -5,20977    |
| E         | A         | 20,878049*            | 2,236573   | ,000 | 14,18538                | 27,57071    |
|           | B         | 13,146341*            | 2,236573   | ,000 | 6,45368                 | 19,83901    |
|           | C         | 14,731707*            | 2,236573   | ,000 | 8,03904                 | 21,42437    |
|           | D         | 11,902439*            | 2,236573   | ,000 | 5,20977                 | 18,59510    |

\*. The mean difference is significant at the 0.05 level.

**Multiple Comparisons**

CRP (ng/mL)  
Tukey HSD

| (I) GROUP | (J) GROUP | Mean Difference (I-J) | Std. Error | Sig. | 95% Confidence Interval |             |
|-----------|-----------|-----------------------|------------|------|-------------------------|-------------|
|           |           |                       |            |      | Lower Bound             | Upper Bound |
| A         | B         | -17,955056*           | 3,488737   | ,000 | -28,39466               | -7,51545    |
|           | C         | -15,775281*           | 3,488737   | ,002 | -26,21489               | -5,33567    |
|           | D         | -21,085072*           | 3,488737   | ,000 | -31,52468               | -10,64547   |
|           | E         | -38,658106*           | 3,488737   | ,000 | -49,09771               | -28,21850   |
| B         | A         | 17,955056*            | 3,488737   | ,000 | 7,51545                 | 28,39466    |
|           | C         | 2,179775              | 3,488737   | ,969 | -8,25983                | 12,61938    |
|           | D         | -3,130016             | 3,488737   | ,895 | -13,56962               | 7,30959     |
|           | E         | -20,703050*           | 3,488737   | ,000 | -31,14266               | -10,26344   |
| C         | A         | 15,775281*            | 3,488737   | ,002 | 5,33567                 | 26,21489    |
|           | B         | -2,179775             | 3,488737   | ,969 | -12,61938               | 8,25983     |
|           | D         | -5,309791             | 3,488737   | ,561 | -15,74940               | 5,12982     |
|           | E         | -22,882825*           | 3,488737   | ,000 | -33,32243               | -12,44322   |
| D         | A         | 21,085072*            | 3,488737   | ,000 | 10,64547                | 31,52468    |
|           | B         | 3,130016              | 3,488737   | ,895 | -7,30959                | 13,56962    |
|           | C         | 5,309791              | 3,488737   | ,561 | -5,12982                | 15,74940    |
|           | E         | -17,573034*           | 3,488737   | ,001 | -28,01264               | -7,13343    |
| E         | A         | 38,658106*            | 3,488737   | ,000 | 28,21850                | 49,09771    |
|           | B         | 20,703050*            | 3,488737   | ,000 | 10,26344                | 31,14266    |
|           | C         | 22,882825*            | 3,488737   | ,000 | 12,44322                | 33,32243    |
|           | D         | 17,573034*            | 3,488737   | ,001 | 7,13343                 | 28,01264    |

\*. The mean difference is significant at the 0.05 level.

**Multiple Comparisons**

MMP8 (ng/mL)  
Tukey HSD

| (I) GROUP | (J) GROUP | Mean Difference (I-J) | Std. Error | Sig. | 95% Confidence Interval |             |
|-----------|-----------|-----------------------|------------|------|-------------------------|-------------|
|           |           |                       |            |      | Lower Bound             | Upper Bound |
| A         | B         | -30,095238*           | 8,572698   | ,017 | -55,74796               | -4,44251    |
|           | C         | -24,000000            | 8,572698   | ,074 | -49,65272               | 1,65272     |
|           | D         | -36,761905*           | 8,572698   | ,003 | -62,41463               | -11,10918   |
|           | E         | -77,523810*           | 8,572698   | ,000 | -103,17653              | -51,87108   |
| B         | A         | 30,095238*            | 8,572698   | ,017 | 4,44251                 | 55,74796    |
|           | C         | 6,095238              | 8,572698   | ,952 | -19,55749               | 31,74796    |
|           | D         | -6,666667             | 8,572698   | ,934 | -32,31939               | 18,98606    |
|           | E         | -47,428571*           | 8,572698   | ,000 | -73,08130               | -21,77585   |
| C         | A         | 24,000000             | 8,572698   | ,074 | -1,65272                | 49,65272    |
|           | B         | -6,095238             | 8,572698   | ,952 | -31,74796               | 19,55749    |
|           | D         | -12,761905            | 8,572698   | ,581 | -38,41463               | 12,89082    |
|           | E         | -53,523810*           | 8,572698   | ,000 | -79,17653               | -27,87108   |
| D         | A         | 36,761905*            | 8,572698   | ,003 | 11,10918                | 62,41463    |
|           | B         | 6,666667              | 8,572698   | ,934 | -18,98606               | 32,31939    |
|           | C         | 12,761905             | 8,572698   | ,581 | -12,89082               | 38,41463    |
|           | E         | -40,761905*           | 8,572698   | ,001 | -66,41463               | -15,10918   |
| E         | A         | 77,523810*            | 8,572698   | ,000 | 51,87108                | 103,17653   |
|           | B         | 47,428571*            | 8,572698   | ,000 | 21,77585                | 73,08130    |
|           | C         | 53,523810*            | 8,572698   | ,000 | 27,87108                | 79,17653    |
|           | D         | 40,761905*            | 8,572698   | ,001 | 15,10918                | 66,41463    |

**Descriptives**

|      | N         | Mean | Std. Deviation | Std. Error | 95% Confidence Interval for Mean |             | Minimum | Maximum |    |
|------|-----------|------|----------------|------------|----------------------------------|-------------|---------|---------|----|
|      |           |      |                |            | Lower Bound                      | Upper Bound |         |         |    |
| ERK1 | Group A   | 6    | 10.00          | 1.789      | .730                             | 8.12        | 11.88   | 7       | 12 |
|      | Group E   | 6    | 5.00           | 2.280      | .931                             | 2.61        | 7.39    | 2       | 9  |
|      | Group D+B | 6    | 14.67          | 3.830      | 1.563                            | 10.65       | 18.69   | 10      | 19 |
|      | Group C   | 6    | 18.33          | 2.944      | 1.202                            | 15.24       | 21.42   | 14      | 22 |
|      | Total     | 24   | 12.00          | 5.748      | 1.173                            | 9.57        | 14.43   | 2       | 22 |
| ERK2 | Group A   | 6    | 14.67          | 4.033      | 1.647                            | 10.43       | 18.90   | 10      | 21 |
|      | Group E   | 6    | 7.33           | 1.966      | .803                             | 5.27        | 9.40    | 4       | 9  |
|      | Group D+B | 6    | 14.17          | 3.371      | 1.376                            | 10.63       | 17.70   | 10      | 20 |
|      | Group C   | 6    | 23.00          | 3.286      | 1.342                            | 19.55       | 26.45   | 20      | 29 |
|      | Total     | 24   | 14.79          | 6.433      | 1.313                            | 12.08       | 17.51   | 4       | 29 |

|           | N  | Mean  | Std. Deviation | Std. Error | 95% Confidence Interval for Mean |             | Minimum | Maximum |
|-----------|----|-------|----------------|------------|----------------------------------|-------------|---------|---------|
|           |    |       |                |            | Lower Bound                      | Upper Bound |         |         |
| Group A   | 6  | 7.83  | 1.722          | .703       | 6.03                             | 9.64        | 6       | 11      |
| Group E   | 6  | 4.33  | 1.862          | .760       | 2.38                             | 6.29        | 2       | 6       |
| Group D+B | 6  | 19.00 | 3.098          | 1.265      | 15.75                            | 22.25       | 15      | 23      |
| Group C   | 6  | 20.50 | 2.429          | .992       | 17.95                            | 23.05       | 17      | 24      |
| Total     | 24 | 12.92 | 7.442          | 1.519      | 9.77                             | 16.06       | 2       | 24      |

EGFR

### Descriptives

TGFb1

|           | N  | Mean  | Std. Deviation | Std. Error | 95% Confidence Interval for Mean |             | Minimum | Maximum |
|-----------|----|-------|----------------|------------|----------------------------------|-------------|---------|---------|
|           |    |       |                |            | Lower Bound                      | Upper Bound |         |         |
| Group A   | 6  | 20.33 | 1.751          | .715       | 18.50                            | 22.17       | 18      | 23      |
| Group E   | 6  | 6.83  | 2.317          | .946       | 4.40                             | 9.26        | 3       | 9       |
| Group D+B | 6  | 13.33 | 3.204          | 1.308      | 9.97                             | 16.70       | 11      | 19      |
| Group C   | 6  | 19.83 | 2.317          | .946       | 17.40                            | 22.26       | 17      | 23      |
| Total     | 24 | 15.08 | 6.071          | 1.239      | 12.52                            | 17.65       | 3       | 23      |

**Descriptives**

COLLAGEN

|           | N  | Mean  | Std. Deviation | Std. Error | 95% Confidence Interval for Mean |             | Minimum | Maximum |
|-----------|----|-------|----------------|------------|----------------------------------|-------------|---------|---------|
|           |    |       |                |            | Lower Bound                      | Upper Bound |         |         |
| Group A   | 6  | 13.50 | 2.881          | 1.176      | 10.48                            | 16.52       | 10      | 17      |
| Group E   | 6  | 7.50  | 2.510          | 1.025      | 4.87                             | 10.13       | 5       | 11      |
| Group D+B | 6  | 19.17 | 2.483          | 1.014      | 16.56                            | 21.77       | 15      | 22      |
| Group C   | 6  | 22.17 | 2.639          | 1.078      | 19.40                            | 24.94       | 20      | 26      |
| Total     | 24 | 15.58 | 6.234          | 1.273      | 12.95                            | 18.22       | 5       | 26      |

**Descriptives**

MMP8 (ng/mL)

|           | N  | Mean      | Std. Deviation | Std. Error | 95% Confidence Interval for Mean |             | Minimum | Maximum |
|-----------|----|-----------|----------------|------------|----------------------------------|-------------|---------|---------|
|           |    |           |                |            | Lower Bound                      | Upper Bound |         |         |
| Group A   | 5  | 29.23810  | 6.445304       | 2.882428   | 21.23519                         | 37.24100    | 18.857  | 35.048  |
| Group E   | 5  | 59.33333  | 16.17665       | 7.234335   | 39.24760                         | 79.41907    | 42.667  | 78.857  |
| Group D+B | 5  | 53.23810  | 16.54178       | 7.397677   | 32.69885                         | 73.77734    | 37.429  | 77.429  |
| Group C   | 5  | 66.00000  | 14.13416       | 6.320969   | 48.45018                         | 83.54982    | 51.238  | 85.524  |
| Group A   | 5  | 106.76190 | 11.917136      | 5.329505   | 91.96483                         | 121.55898   | 91.238  | 123.143 |
| Total     | 25 | 62.91429  | 28.532089      | 5.706418   | 51.13682                         | 74.69175    | 18.857  | 123.143 |

**ANOVA**

EGFR

|                | Sum of Squares | df | Mean Square | F      | Sig. |
|----------------|----------------|----|-------------|--------|------|
| Between Groups | 1164.167       | 3  | 388.056     | 70.770 | .000 |
| Within Groups  | 109.667        | 20 | 5.483       |        |      |
| Total          | 1273.833       | 23 |             |        |      |

**ANOVA**

COLAGEN

|                | Sum of Squares | Df | Mean Square | F      | Sig. |
|----------------|----------------|----|-------------|--------|------|
| Between Groups | 755.167        | 3  | 251.722     | 36.306 | .000 |
| Within Groups  | 138.667        | 20 | 6.933       |        |      |
| Total          | 893.833        | 23 |             |        |      |

**ANOVA**

|                     | Sum of Squares | df | Mean Square | F      | Sig. |
|---------------------|----------------|----|-------------|--------|------|
| ERK1 Between Groups | 601.333        | 3  | 200.444     | 25.266 | .000 |
| ERK1 Within Groups  | 158.667        | 20 | 7.933       |        |      |
| ERK1 Total          | 760.000        | 23 |             |        |      |
| ERK2 Between Groups | 740.458        | 3  | 246.819     | 23.340 | .000 |
| ERK2 Within Groups  | 211.500        | 20 | 10.575      |        |      |
| ERK2 Total          | 951.958        | 23 |             |        |      |

**ANOVA**

TGFb1

|                | Sum of Squares | Df | Mean Square | F      | Sig. |
|----------------|----------------|----|-------------|--------|------|
| Between Groups | 727.500        | 3  | 242.500     | 40.305 | .000 |
| Within Groups  | 120.333        | 20 | 6.017       |        |      |
| Total          | 847.833        | 23 |             |        |      |



**ANOVA**

MMP8 (ng/mL)

|                | Sum of Squares | Df | Mean Square | F      | Sig. |
|----------------|----------------|----|-------------|--------|------|
| Between Groups | 15863.365      | 4  | 3965.841    | 21.585 | .000 |
| Within Groups  | 3674.558       | 20 | 183.728     |        |      |
| Total          | 19537.923      | 24 |             |        |      |

**Multiple Comparisons**

EGFR

Tukey HSD

| (I) GROUP | (J) GROUP | Mean Difference (I-J) | Std. Error | Sig. | 95% Confidence Interval |             |
|-----------|-----------|-----------------------|------------|------|-------------------------|-------------|
|           |           |                       |            |      | Lower Bound             | Upper Bound |
| Group A   | Group E   | 3.500                 | 1.352      | .076 | -.28                    | 7.28        |
|           | Group B+D | -11.167*              | 1.352      | .000 | -14.95                  | -7.38       |
|           | Group C   | -12.667*              | 1.352      | .000 | -16.45                  | -8.88       |
| Group E   | Group A   | -3.500                | 1.352      | .076 | -7.28                   | .28         |
|           | Group B+D | -14.667*              | 1.352      | .000 | -18.45                  | -10.88      |
|           | Group C   | -16.167*              | 1.352      | .000 | -19.95                  | -12.38      |
| Group B+D | Group A   | 11.167*               | 1.352      | .000 | 7.38                    | 14.95       |
|           | Group E   | 14.667*               | 1.352      | .000 | 10.88                   | 18.45       |
|           | Group C   | -1.500                | 1.352      | .688 | -5.28                   | 2.28        |
| Group C   | Group A   | 12.667*               | 1.352      | .000 | 8.88                    | 16.45       |
|           | Group E   | 16.167*               | 1.352      | .000 | 12.38                   | 19.95       |
|           | Group B+D | 1.500                 | 1.352      | .688 | -2.28                   | 5.28        |

\*. The mean difference is significant at the 0.05 level.

### Multiple Comparisons

Tukey HSD

| Dependent Variable | (I) GROUP | (J) GROUP | Mean Difference (I-J) | Std. Error |      | 95% Confidence Interval |             |
|--------------------|-----------|-----------|-----------------------|------------|------|-------------------------|-------------|
|                    |           |           |                       |            |      | Lower Bound             | Upper Bound |
| ERK1               | Group A   | Group E   | 5.000*                | 1.626      | .028 | .45                     | 9.55        |
|                    |           | Group B+D | -4.667*               | 1.626      | .043 | -9.22                   | -.12        |
|                    |           | Group C   | -8.333*               | 1.626      | .000 | -12.88                  | -3.78       |
|                    | Group E   | Group A   | -5.000*               | 1.626      | .028 | -9.55                   | -.45        |
|                    |           | Group B+D | -9.667*               | 1.626      | .000 | -14.22                  | -5.12       |
|                    |           | Group C   | -13.333*              | 1.626      | .000 | -17.88                  | -8.78       |
|                    | Group B+D | Group A   | 4.667*                | 1.626      | .043 | .12                     | 9.22        |
|                    |           | Group E   | 9.667*                | 1.626      | .000 | 5.12                    | 14.22       |
|                    |           | Group C   | -3.667                | 1.626      | .143 | -8.22                   | .88         |
|                    | Group C   | Group A   | 8.333*                | 1.626      | .000 | 3.78                    | 12.88       |
|                    |           | Group E   | 13.333*               | 1.626      | .000 | 8.78                    | 17.88       |
|                    |           | Group B+D | 3.667                 | 1.626      | .143 | -.88                    | 8.22        |
| ERK2               | Group A   | Group E   | 7.333*                | 1.877      | .004 | 2.08                    | 12.59       |
|                    |           | Group B+D | .500                  | 1.877      | .993 | -4.75                   | 5.75        |
|                    |           | Group C   | -8.333*               | 1.877      | .001 | -13.59                  | -3.08       |
|                    | Group E   | Group A   | -7.333*               | 1.877      | .004 | -12.59                  | -2.08       |
|                    |           | Group B+D | -6.833*               | 1.877      | .008 | -12.09                  | -1.58       |
|                    |           | Group C   | -15.667*              | 1.877      | .000 | -20.92                  | -10.41      |
|                    | Group B+D | Group A   | -.500                 | 1.877      | .993 | -5.75                   | 4.75        |
|                    |           | Group E   | 6.833*                | 1.877      | .008 | 1.58                    | 12.09       |
|                    |           | Group C   | -8.833*               | 1.877      | .001 | -14.09                  | -3.58       |
|                    | Group C   | Group A   | 8.333*                | 1.877      | .001 | 3.08                    | 13.59       |
|                    |           | Group E   | 15.667*               | 1.877      | .000 | 10.41                   | 20.92       |
|                    |           | Group B+D | 8.833*                | 1.877      | .001 | 3.58                    | 14.09       |

\*. The mean difference is significant at the 0.05 level.

**Multiple Comparisons**

TGFb1  
Tukey HSD

| (I) GROUP | (J) GROUP | Mean Difference (I-J) | Std. Error | Sig. | 95% Confidence Interval |             |
|-----------|-----------|-----------------------|------------|------|-------------------------|-------------|
|           |           |                       |            |      | Lower Bound             | Upper Bound |
| Group A   | Group E   | 13.500*               | 1.416      | .000 | 9.54                    | 17.46       |
|           | Group B+D | 7.000*                | 1.416      | .000 | 3.04                    | 10.96       |
|           | Group C   | .500                  | 1.416      | .984 | -3.46                   | 4.46        |
| Group E   | Group A   | -13.500*              | 1.416      | .000 | -17.46                  | -9.54       |
|           | Group B+D | -6.500*               | 1.416      | .001 | -10.46                  | -2.54       |
|           | Group C   | -13.000*              | 1.416      | .000 | -16.96                  | -9.04       |
| Group B+D | Group A   | -7.000*               | 1.416      | .000 | -10.96                  | -3.04       |
|           | Group E   | 6.500*                | 1.416      | .001 | 2.54                    | 10.46       |
|           | Group C   | -6.500*               | 1.416      | .001 | -10.46                  | -2.54       |
| Group C   | Group A   | -.500                 | 1.416      | .984 | -4.46                   | 3.46        |
|           | Group E   | 13.000*               | 1.416      | .000 | 9.04                    | 16.96       |
|           | Group B+D | 6.500*                | 1.416      | .001 | 2.54                    | 10.46       |

\*. The mean difference is significant at the 0.05 level.

**Multiple Comparisons**

COLLAGEN  
Tukey HSD

| (I) GROUP | (J) GROUP | Mean Difference (I-J) | Std. Error | Sig. | 95% Confidence Interval |             |
|-----------|-----------|-----------------------|------------|------|-------------------------|-------------|
|           |           |                       |            |      | Lower Bound             | Upper Bound |
| Group A   | Group E   | 6.000*                | 1.520      | .004 | 1.74                    | 10.26       |
|           | Group B+D | -5.667*               | 1.520      | .007 | -9.92                   | -1.41       |
|           | Group C   | -8.667*               | 1.520      | .000 | -12.92                  | -4.41       |
| Group E   | Group A   | -6.000*               | 1.520      | .004 | -10.26                  | -1.74       |
|           | Group B+D | -11.667*              | 1.520      | .000 | -15.92                  | -7.41       |
|           | Group C   | -14.667*              | 1.520      | .000 | -18.92                  | -10.41      |
| Group B+D | Group A   | 5.667*                | 1.520      | .007 | 1.41                    | 9.92        |
|           | Group E   | 11.667*               | 1.520      | .000 | 7.41                    | 15.92       |
|           | Group C   | -3.000                | 1.520      | .231 | -7.26                   | 1.26        |
| Group C   | Group A   | 8.667*                | 1.520      | .000 | 4.41                    | 12.92       |
|           | Group E   | 14.667*               | 1.520      | .000 | 10.41                   | 18.92       |
|           | Group B+D | 3.000                 | 1.520      | .231 | -1.26                   | 7.26        |

\*. The mean difference is significant at the 0.05 level.

### Multiple Comparisons

MMP8 (ng/mL)

Tukey HSD

| (I) GROUP | (J) GROUP | Mean Difference (I-J) | Std. Error | Sig. | 95% Confidence Interval |             |
|-----------|-----------|-----------------------|------------|------|-------------------------|-------------|
|           |           |                       |            |      | Lower Bound             | Upper Bound |
| Group A   | Group B   | -30.095238*           | 8.572698   | .017 | -55.74796               | -4.44251    |
|           | Group C   | -24.000000            | 8.572698   | .074 | -49.65272               | 1.65272     |
|           | Group D   | -36.761905*           | 8.572698   | .003 | -62.41463               | -11.10918   |
|           | Group E   | -77.523810*           | 8.572698   | .000 | -103.17653              | -51.87108   |
| Group B   | Group A   | 30.095238*            | 8.572698   | .017 | 4.44251                 | 55.74796    |
|           | Group C   | 6.095238              | 8.572698   | .952 | -19.55749               | 31.74796    |
|           | Group D   | -6.666667             | 8.572698   | .934 | -32.31939               | 18.98606    |
|           | Group E   | -47.428571*           | 8.572698   | .000 | -73.08130               | -21.77585   |
| Group C   | Group A   | 24.000000             | 8.572698   | .074 | -1.65272                | 49.65272    |
|           | Group B   | -6.095238             | 8.572698   | .952 | -31.74796               | 19.55749    |
|           | Group D   | -12.761905            | 8.572698   | .581 | -38.41463               | 12.89082    |
|           | Group E   | -53.523810*           | 8.572698   | .000 | -79.17653               | -27.87108   |
| Group D   | Group A   | 36.761905*            | 8.572698   | .003 | 11.10918                | 62.41463    |
|           | Group B   | 6.666667              | 8.572698   | .934 | -18.98606               | 32.31939    |
|           | Group C   | 12.761905             | 8.572698   | .581 | -12.89082               | 38.41463    |
|           | Group E   | -40.761905*           | 8.572698   | .001 | -66.41463               | -15.10918   |
| Group E   | Group A   | 77.523810*            | 8.572698   | .000 | 51.87108                | 103.17653   |
|           | Group B   | 47.428571*            | 8.572698   | .000 | 21.77585                | 73.08130    |
|           | Group C   | 53.523810*            | 8.572698   | .000 | 27.87108                | 79.17653    |
|           | Group D   | 40.761905*            | 8.572698   | .001 | 15.10918                | 66.41463    |

\*. The mean difference is significant at the 0.05 level.

EGFR

Tukey HSD

| GROUP     | N | Subset for alpha = 0.05 |       |
|-----------|---|-------------------------|-------|
|           |   | 1                       | 2     |
| Group E   | 6 | 4.33                    |       |
| Group A   | 6 | 7.83                    |       |
| Group B+D | 6 |                         | 19.00 |
| Group C   | 6 |                         | 20.50 |
| Sig.      |   | .076                    | .688  |

Means for groups in homogeneous subsets are displayed.

**ERK1**

Tukey HSD

| GROUP     | N | Subset for alpha = 0.05 |       |       |
|-----------|---|-------------------------|-------|-------|
|           |   | 1                       | 2     | 3     |
| Group E   | 6 | 5.00                    |       |       |
| Group A   | 6 |                         | 10.00 |       |
| Group B+D | 6 |                         |       | 14.67 |
| Group C   | 6 |                         |       | 18.33 |
| Sig.      |   | 1.000                   | 1.000 | .143  |

Means for groups in homogeneous subsets are displayed.

**ERK2**

Tukey HSD

| GROUP     | N | Subset for alpha = 0.05 |       |       |
|-----------|---|-------------------------|-------|-------|
|           |   | 1                       | 2     | 3     |
| Group E   | 6 | 7.33                    |       |       |
| Group A   | 6 |                         | 14.17 |       |
| Group B+D | 6 |                         | 14.67 |       |
| Group C   | 6 |                         |       | 23.00 |
| Sig.      |   | 1.000                   | .993  | 1.000 |

Means for groups in homogeneous subsets are displayed.

**TGFb1**

Tukey HSD

| GROUP     | N | Subset for alpha = 0.05 |       |       |
|-----------|---|-------------------------|-------|-------|
|           |   | 1                       | 2     | 3     |
| Group E   | 6 | 6.83                    |       |       |
| Group B+D | 6 |                         | 13.33 |       |
| Group C   | 6 |                         |       | 19.83 |
| Group A   | 6 |                         |       | 20.33 |

**ERK1**

Tukey HSD

| GROUP     | N | Subset for alpha = 0.05 |       |       |
|-----------|---|-------------------------|-------|-------|
|           |   | 1                       | 2     | 3     |
| Group E   | 6 | 5.00                    |       |       |
| Group A   | 6 |                         | 10.00 |       |
| Group B+D | 6 |                         |       | 14.67 |
| Group C   | 6 |                         |       | 18.33 |
| Sig.      |   | 1.000                   | 1.000 | .143  |

Means for groups in homogeneous subsets are displayed.

|      |  |       |       |      |
|------|--|-------|-------|------|
| Sig. |  | 1.000 | 1.000 | .984 |
|------|--|-------|-------|------|

Means for groups in homogeneous subsets are displayed.

**COLLAGEN**

Tukey HSD

| GROUP     | N | Subset for alpha = 0.05 |       |       |
|-----------|---|-------------------------|-------|-------|
|           |   | 1                       | 2     | 3     |
| Group E   | 6 | 7.50                    |       |       |
| Group A   | 6 |                         | 13.50 |       |
| Group B+D | 6 |                         |       | 19.17 |
| Group C   | 6 |                         |       | 22.17 |
| Sig.      |   | 1.000                   | 1.000 | .231  |

Means for groups in homogeneous subsets are displayed.

**MMP8 (ng/mL)**

Tukey HSD

| Group   | N | Subset for alpha = 0.05 |          |           |
|---------|---|-------------------------|----------|-----------|
|         |   | 1                       | 2        | 3         |
| Group A | 5 | 29.23810                |          |           |
| Group C | 5 | 53.23810                | 53.23810 |           |
| Group B | 5 |                         | 59.33333 |           |
| Group D | 5 |                         | 66.00000 |           |
| Group E | 5 |                         |          | 106.76190 |
| Sig.    |   | .074                    | .581     | 1.000     |

Means for groups in homogeneous subsets are displayed.

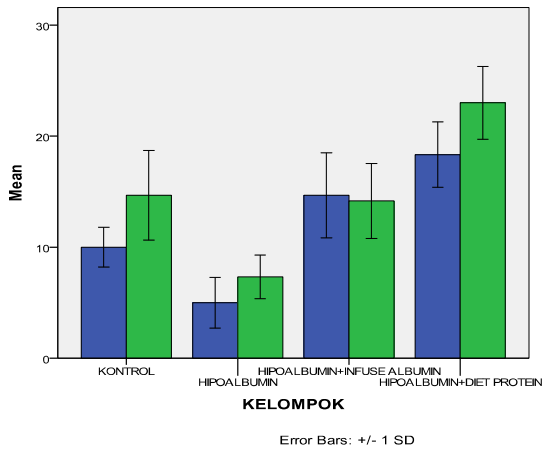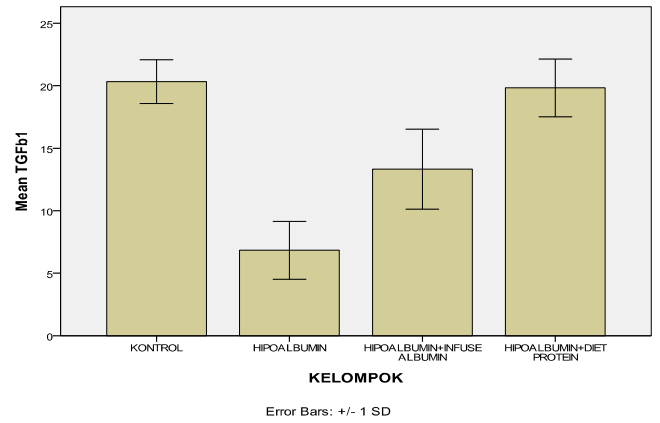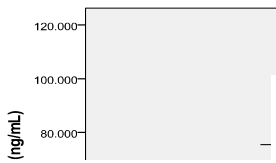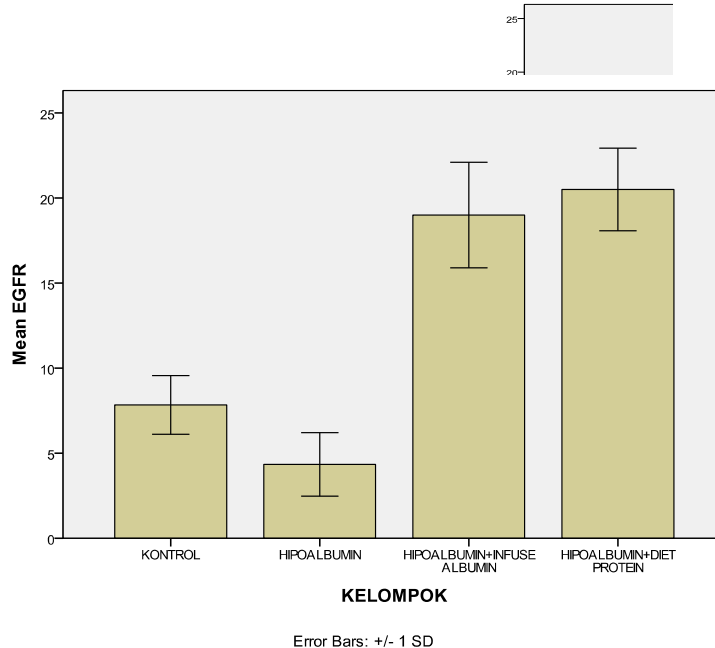





### Descriptive Statistics

|            | kelompok | Mean    | Std. Deviation | N  |
|------------|----------|---------|----------------|----|
| EGFRhr1    | 1,00     | 11,6000 | 3,64692        | 5  |
|            | 2,00     | 13,0000 | 1,58114        | 5  |
|            | 3,00     | 11,4000 | 2,19089        | 5  |
|            | 4,00     | 11,4000 | 2,30217        | 5  |
|            | 5,00     | 9,2000  | 1,48324        | 5  |
|            | Total    | 11,3200 | 2,49533        | 25 |
| ERK1hr1    | 1,00     | 14,8000 | 4,32435        | 5  |
|            | 2,00     | 12,6000 | 2,60768        | 5  |
|            | 3,00     | 12,4000 | 2,30217        | 5  |
|            | 4,00     | 11,2000 | 2,38747        | 5  |
|            | 5,00     | 9,6000  | 1,14018        | 5  |
|            | Total    | 12,1200 | 3,05941        | 25 |
| ERK2hr1    | 1,00     | 11,2000 | 1,92354        | 5  |
|            | 2,00     | 9,4000  | 1,81659        | 5  |
|            | 3,00     | 10,0000 | 2,44949        | 5  |
|            | 4,00     | 9,6000  | 1,81659        | 5  |
|            | 5,00     | 9,6000  | 1,51658        | 5  |
|            | Total    | 9,9600  | 1,88149        | 25 |
| TGFhr1     | 1,00     | 17,8000 | 6,26099        | 5  |
|            | 2,00     | 22,6000 | 2,60768        | 5  |
|            | 3,00     | 20,0000 | 5,70088        | 5  |
|            | 4,00     | 11,8000 | 1,92354        | 5  |
|            | 5,00     | 22,4000 | 2,88097        | 5  |
|            | Total    | 18,9200 | 5,61189        | 25 |
| Kolagenhr1 | 1,00     | 13,4000 | 3,13050        | 5  |
|            | 2,00     | 12,8000 | 2,58844        | 5  |
|            | 3,00     | 13,8000 | 2,77489        | 5  |
|            | 4,00     | 12,6000 | 2,79285        | 5  |
|            | 5,00     | 13,4000 | 3,43511        | 5  |
|            | Total    | 13,2000 | 2,73861        | 25 |
| MMP8hr1    | 1,00     | 11,4000 | 3,97492        | 5  |
|            | 2,00     | 12,4000 | 2,50998        | 5  |
|            | 3,00     | 11,2000 | 3,34664        | 5  |
|            | 4,00     | 11,4000 | 1,67332        | 5  |
|            | 5,00     | 10,0000 | 1,58114        | 5  |
|            | Total    | 11,2800 | 2,65393        | 25 |

### Descriptive Statistics

|            | kelompok | Mean    | Std. Deviation | N  |
|------------|----------|---------|----------------|----|
| EGFRhr3    | 1,00     | 15,2000 | 5,16720        | 5  |
|            | 2,00     | 14,8000 | 1,92354        | 5  |
|            | 3,00     | 16,8000 | 4,54973        | 5  |
|            | 4,00     | 14,8000 | 3,83406        | 5  |
|            | 5,00     | 5,2000  | 3,27109        | 5  |
|            | Total    | 13,3600 | 5,53685        | 25 |
| ERK1hr3    | 1,00     | 10,4000 | 2,30217        | 5  |
|            | 2,00     | 10,8000 | 2,38747        | 5  |
|            | 3,00     | 8,8000  | 3,56371        | 5  |
|            | 4,00     | 11,2000 | 2,48998        | 5  |
|            | 5,00     | 5,6000  | 2,40832        | 5  |
|            | Total    | 9,3600  | 3,21299        | 25 |
| ERK2hr3    | 1,00     | 13,6000 | 2,07364        | 5  |
|            | 2,00     | 16,2000 | 1,30384        | 5  |
|            | 3,00     | 17,2000 | 1,92354        | 5  |
|            | 4,00     | 9,6000  | 1,14018        | 5  |
|            | 5,00     | 9,0000  | 1,87083        | 5  |
|            | Total    | 13,1200 | 3,74522        | 25 |
| TGFhr3     | 1,00     | 15,0000 | 2,91548        | 5  |
|            | 2,00     | 15,8000 | 3,56371        | 5  |
|            | 3,00     | 16,6000 | 3,64692        | 5  |
|            | 4,00     | 13,6000 | 3,04959        | 5  |
|            | 5,00     | 11,2000 | 2,38747        | 5  |
|            | Total    | 14,4400 | 3,46506        | 25 |
| Kolagenhr3 | 1,00     | 11,4000 | 2,30217        | 5  |
|            | 2,00     | 12,4000 | 3,28634        | 5  |
|            | 3,00     | 15,4000 | 3,36155        | 5  |
|            | 4,00     | 10,6000 | 1,14018        | 5  |
|            | 5,00     | 9,2000  | 1,30384        | 5  |
|            | Total    | 11,8000 | 3,09570        | 25 |
| MMP8hr3    | 1,00     | 11,8000 | 2,38747        | 5  |
|            | 2,00     | 12,4000 | 2,07364        | 5  |
|            | 3,00     | 10,6000 | 2,50998        | 5  |
|            | 4,00     | 10,2000 | 1,30384        | 5  |
|            | 5,00     | 14,6000 | 2,79285        | 5  |
|            | Total    | 11,9200 | 2,61279        | 25 |

**Descriptive Statistics**

|            | kelompok | Mean    | Std. Deviation | N  |
|------------|----------|---------|----------------|----|
| EGFRhr7    | 1,00     | 24,8000 | 3,27109        | 5  |
|            | 2,00     | 25,4000 | 2,96648        | 5  |
|            | 3,00     | 25,2000 | 4,32435        | 5  |
|            | 4,00     | 19,8000 | 2,86356        | 5  |
|            | 5,00     | 4,2000  | 1,78885        | 5  |
|            | Total    | 19,8800 | 8,76223        | 25 |
| ERK1hr7    | 1,00     | 23,0000 | 3,53553        | 5  |
|            | 2,00     | 24,4000 | 2,70185        | 5  |
|            | 3,00     | 23,0000 | 3,00000        | 5  |
|            | 4,00     | 18,6000 | 1,94936        | 5  |
|            | 5,00     | 3,4000  | 1,51658        | 5  |
|            | Total    | 18,4800 | 8,30723        | 25 |
| ERK2hr7    | 1,00     | 15,6000 | 4,82701        | 5  |
|            | 2,00     | 24,0000 | 2,34521        | 5  |
|            | 3,00     | 23,8000 | 3,70135        | 5  |
|            | 4,00     | 19,0000 | 5,65685        | 5  |
|            | 5,00     | 3,2000  | 1,30384        | 5  |
|            | Total    | 17,1200 | 8,56991        | 25 |
| TGFhr7     | 1,00     | 15,6000 | 1,94936        | 5  |
|            | 2,00     | 26,4000 | 3,36155        | 5  |
|            | 3,00     | 24,6000 | 3,64692        | 5  |
|            | 4,00     | 22,6000 | 3,50714        | 5  |
|            | 5,00     | 6,6000  | 2,07364        | 5  |
|            | Total    | 19,1600 | 7,90928        | 25 |
| Kolagenhr7 | 1,00     | 23,4000 | 3,64692        | 5  |
|            | 2,00     | 25,4000 | 1,67332        | 5  |
|            | 3,00     | 25,6000 | 2,50998        | 5  |
|            | 4,00     | 19,6000 | 1,14018        | 5  |
|            | 5,00     | 4,6000  | 2,07364        | 5  |
|            | Total    | 19,7200 | 8,30923        | 25 |
| MMP8hr7    | 1,00     | 11,0000 | 2,34521        | 5  |
|            | 2,00     | 7,8000  | 1,30384        | 5  |
|            | 3,00     | 8,0000  | 2,23607        | 5  |
|            | 4,00     | 28,0000 | 2,73861        | 5  |
|            | 5,00     | 28,0000 | 2,73861        | 5  |
|            | Total    | 16,5600 | 9,83650        | 25 |

**Multivariate Tests<sup>c</sup>**

| Effect    |                    | Value   | F                    | Hypothesis df | Error df | Sig. | Partial Eta Squared |
|-----------|--------------------|---------|----------------------|---------------|----------|------|---------------------|
| Intercept | Pillai's Trace     | ,994    | 422,837 <sup>a</sup> | 6,000         | 15,000   | ,000 | ,994                |
|           | Wilks' Lambda      | ,006    | 422,837 <sup>a</sup> | 6,000         | 15,000   | ,000 | ,994                |
|           | Hotelling's Trace  | 169,135 | 422,837 <sup>a</sup> | 6,000         | 15,000   | ,000 | ,994                |
|           | Roy's Largest Root | 169,135 | 422,837 <sup>a</sup> | 6,000         | 15,000   | ,000 | ,994                |
| Group     | Pillai's Trace     | 1,502   | 1,804                | 24,000        | 72,000   | ,029 | ,375                |
|           | Wilks' Lambda      | ,086    | 2,276                | 24,000        | 53,539   | ,006 | ,458                |
|           | Hotelling's Trace  | 4,743   | 2,668                | 24,000        | 54,000   | ,001 | ,542                |
|           | Roy's Largest Root | 3,347   | 10,041 <sup>b</sup>  | 6,000         | 18,000   | ,000 | ,770                |

a. Exact statistic

b. The statistic is an upper bound on F that yields a lower bound on the significance level.

c. Design: Intercept+ Group

**Multivariate Tests<sup>c</sup>**

| Effect    |                    | Value   | F                    | Hypothesis df | Error df | Sig. | Partial Eta Squared |
|-----------|--------------------|---------|----------------------|---------------|----------|------|---------------------|
| Intercept | Pillai's Trace     | ,995    | 494,480 <sup>a</sup> | 6,000         | 15,000   | ,000 | ,995                |
|           | Wilks' Lambda      | ,005    | 494,480 <sup>a</sup> | 6,000         | 15,000   | ,000 | ,995                |
|           | Hotelling's Trace  | 197,792 | 494,480 <sup>a</sup> | 6,000         | 15,000   | ,000 | ,995                |
|           | Roy's Largest Root | 197,792 | 494,480 <sup>a</sup> | 6,000         | 15,000   | ,000 | ,995                |
| Group     | Pillai's Trace     | 2,471   | 4,846                | 24,000        | 72,000   | ,000 | ,618                |
|           | Wilks' Lambda      | ,002    | 11,533               | 24,000        | 53,539   | ,000 | ,795                |
|           | Hotelling's Trace  | 44,260  | 24,896               | 24,000        | 54,000   | ,000 | ,917                |
|           | Roy's Largest Root | 37,684  | 113,053 <sup>b</sup> | 6,000         | 18,000   | ,000 | ,974                |

a. Exact statistic

b. The statistic is an upper bound on F that yields a lower bound on the significance level.

c. Design: Intercept+ Group

**Multivariate Tests<sup>c</sup>**

| Effect    |                    | Value   | F                    | Hypothesis df | Error df | Sig. | Partial Eta Squared |
|-----------|--------------------|---------|----------------------|---------------|----------|------|---------------------|
| Intercept | Pillai's Trace     | ,997    | 837,612 <sup>a</sup> | 6,000         | 15,000   | ,000 | ,997                |
|           | Wilks' Lambda      | ,003    | 837,612 <sup>a</sup> | 6,000         | 15,000   | ,000 | ,997                |
|           | Hotelling's Trace  | 335,045 | 837,612 <sup>a</sup> | 6,000         | 15,000   | ,000 | ,997                |
|           | Roy's Largest Root | 335,045 | 837,612 <sup>a</sup> | 6,000         | 15,000   | ,000 | ,997                |
| Group     | Pillai's Trace     | 2,539   | 5,215                | 24,000        | 72,000   | ,000 | ,635                |
|           | Wilks' Lambda      | ,001    | 14,638               | 24,000        | 53,539   | ,000 | ,829                |
|           | Hotelling's Trace  | 57,363  | 32,267               | 24,000        | 54,000   | ,000 | ,935                |
|           | Roy's Largest Root | 48,067  | 144,200 <sup>b</sup> | 6,000         | 18,000   | ,000 | ,980                |

a. Exact statistic

b. The statistic is an upper bound on F that yields a lower bound on the significance level.

c. Design: Intercept+ Group

### Descriptive Statistics

| Group |       | Mean   | Std. Deviation | N  |
|-------|-------|--------|----------------|----|
| LLhr1 | 1,00  | 4,8000 | ,83666         | 5  |
|       | 2,00  | 5,4000 | 1,81659        | 5  |
|       | 3,00  | 5,4000 | ,89443         | 5  |
|       | 4,00  | 6,6000 | 2,07364        | 5  |
|       | 5,00  | 6,0000 | 1,58114        | 5  |
|       | Total | 5,6400 | 1,52425        | 25 |
| LLhr3 | 1,00  | 3,4000 | 1,14018        | 5  |
|       | 2,00  | 3,4000 | 1,14018        | 5  |
|       | 3,00  | 4,4000 | 1,14018        | 5  |
|       | 4,00  | 5,4000 | ,54772         | 5  |
|       | 5,00  | 6,2000 | 1,92354        | 5  |
|       | Total | 4,5600 | 1,60935        | 25 |
| LLhr5 | 1,00  | 2,0000 | ,70711         | 5  |
|       | 2,00  | 2,4000 | ,89443         | 5  |
|       | 3,00  | 1,8000 | ,83666         | 5  |
|       | 4,00  | 4,4000 | 1,14018        | 5  |
|       | 5,00  | 5,8000 | 1,48324        | 5  |
|       | Total | 3,2800 | 1,86011        | 25 |
| LLhr7 | 1,00  | 2,0000 | ,70711         | 5  |
|       | 2,00  | 2,6000 | 1,51658        | 5  |
|       | 3,00  | 1,8000 | ,83666         | 5  |
|       | 4,00  | 2,4000 | 1,14018        | 5  |
|       | 5,00  | 5,6000 | ,89443         | 5  |
|       | Total | 2,8800 | 1,71561        | 25 |
